# Supplementary material for: Molecular engineering of antibodies for site-specific conjugation to lipid polydopamine hybrid nanoparticles
Source: PubMed Central journal article supplement — Acta Pharm Sin B. 2020 Jul 18;10(11):2212–26. doi: 10.1016/j.apsb.2020.07.006 (PMC7715496; doi:10.1016/j.apsb.2020.07.006), 2020-07-18
Supplement: mmc1.pdf [file mmc1.pdf]

**Supporting Information for**

**ORIGINAL ARTICLE**

**Molecular engineering of antibodies for site-specific conjugation to lipid polydopamine hybrid nanoparticles**

Hobin Yang<sup>a,†</sup>, Quoc-Viet Le<sup>b,†</sup>, Gayong Shim<sup>b,\*</sup>, Yu-Kyoung Oh<sup>b,\*</sup> Young Kee Shin<sup>a,c,d,\*</sup>

<sup>a</sup>*Laboratory of Molecular Pathology and Cancer Genomics, College of Pharmacy and Research Institute of Pharmaceutical Sciences, Seoul National University, Seoul 08826, Republic of Korea*

<sup>b</sup>*College of Pharmacy and Research Institute of Pharmaceutical Sciences, Seoul National University, Seoul 08826, Republic of Korea*

<sup>c</sup>*Molecular Medicine and Biopharmaceutical Sciences, Graduate School of Convergence Science and Technology, Seoul National University, Seoul 08826, Republic of Korea*

<sup>d</sup>*Bio-MAX, Seoul National University, Seoul 08826, Republic of Korea*

\*Corresponding authors.

E-mail addresses: shimg@snu.ac.kr (Gayong Shim), ohyk@snu.ac.kr (Yu-Kyoung Oh), ykeeshin@snu.ac.kr (Young Kee Shin).

<sup>†</sup>These authors made equal contributions to this work.

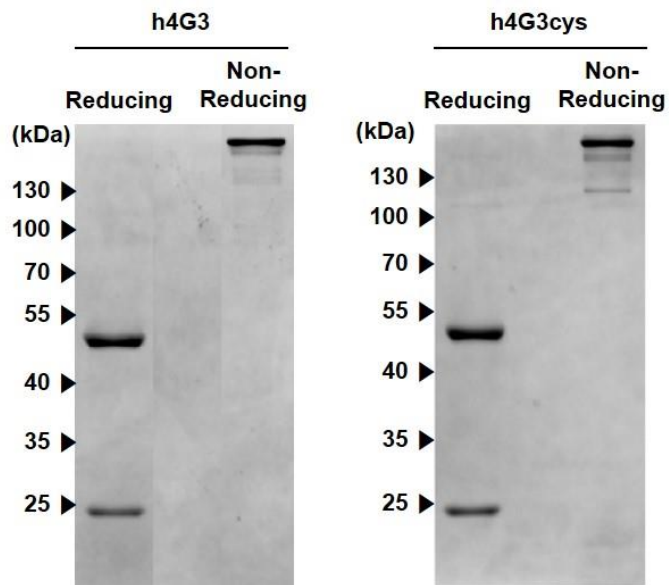

**Figure S1** Generation of h4G3 Q124C mutant (h4G3cys) for site-specific conjugation. The h4G3 and h4G3cys were purified from culture fluids using a protein A column and separated by SDS-PAGE under reducing and non-reducing conditions.

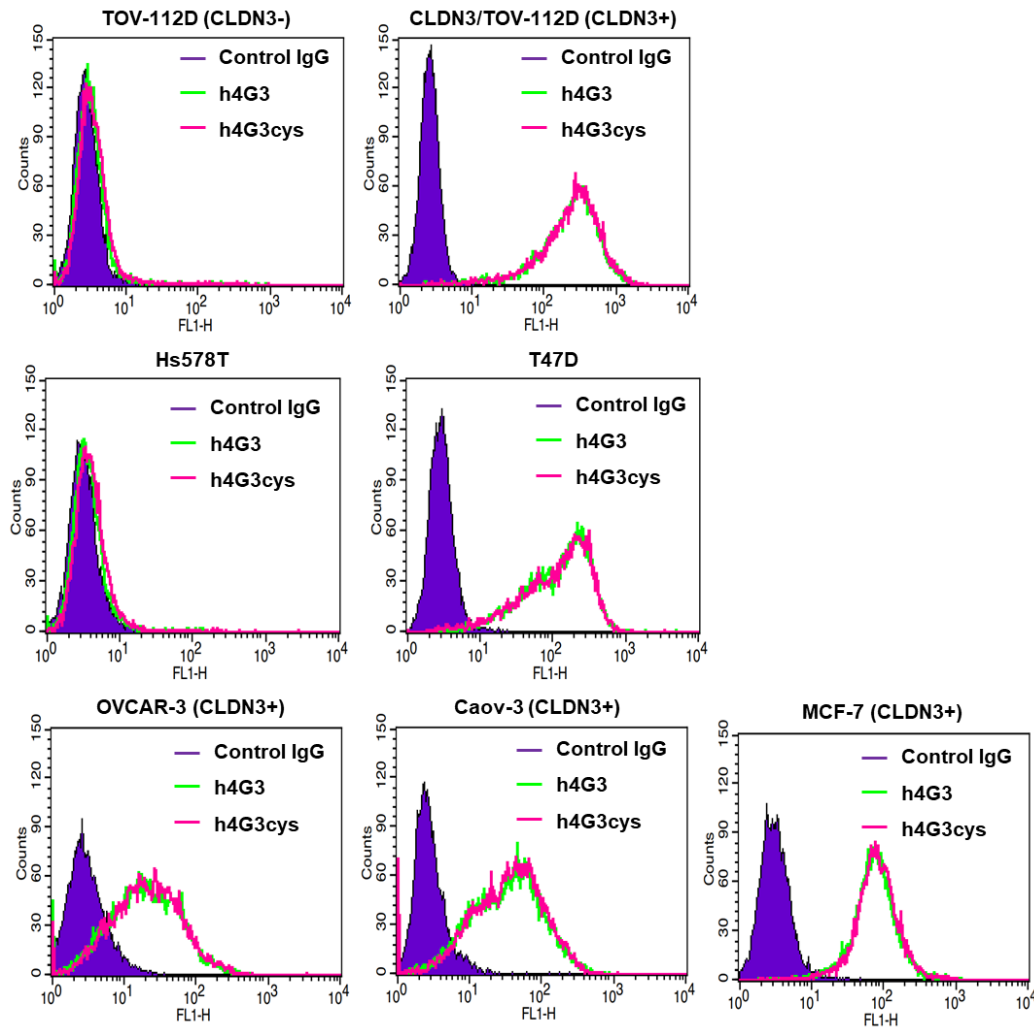

**Figure S2** CLDN3-binding affinity of h4G3 and h4G3cys. Various cells with different expression level of CLDN3 were incubated with h4G3 and h4G3cys at 2.5  $\mu\text{g/mL}$  for 1 h. Bound antibodies were detected using FITC-conjugated goat anti-human IgG secondary antibody and analyzed by flow cytometry.

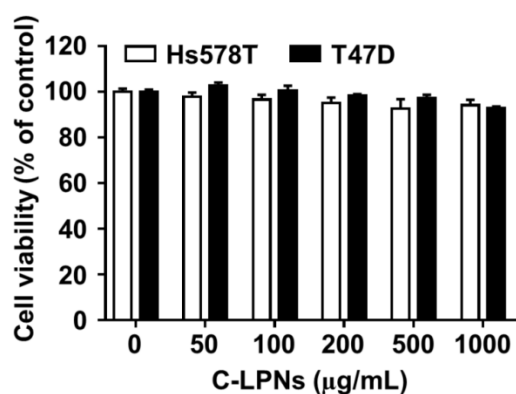

**Figure S3** Viability of cells treated with C-LPNs. The cytotoxicity of C-LPNs was determined in Hs578T and T47D cells. The cells were treated with C-LPNs of various concentrations for 1 h, and incubated for 24 h. The cytotoxicity was measured using a WST assay. Data represent means  $\pm$ SD ( $n=3$ ).

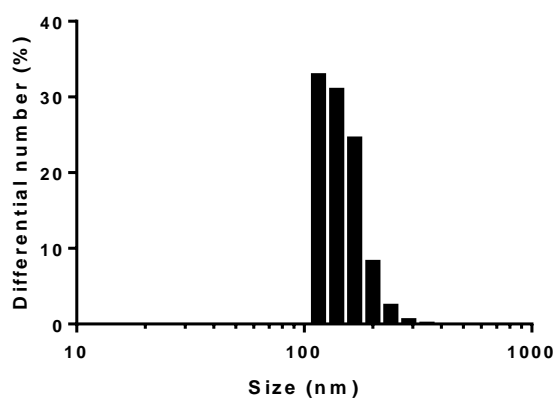

**Figure S4** Size distribution of C-LPNs. The size distribution of C-LPNs was measured by light dynamic scattering.

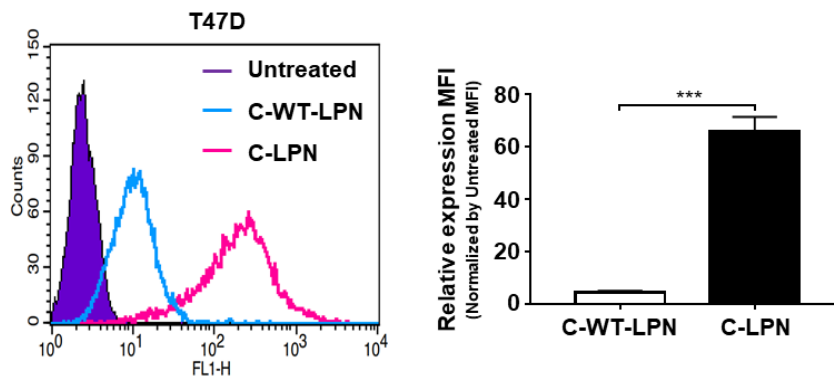

**Figure S5** CLDN3-positive cell binding of nanoparticles. T47D cells were treated with LPNs modified with wild type h4G3 (C-WT-LPNs), or with C-LPNs. For flow cytometry, the nanoparticles were labeled with FITC. After treatment of T47D cells with fluorescent nanoparticles for 1 h, flow cytometry analysis was done. The relative mean fluorescence intensity (MFI) was determined by dividing with untreated MFI. Data represent means  $\pm$ SD ( $n=3$ ; \*\*\*  $P<0.001$ ).

**Table S1** Binding kinetics of h4G3cys to CLDN3/TOV-112D.

| Fitting model        | $k_{a1}$ ( $M^{-1}\cdot s^{-1}$ ) | $k_{d1}$ ( $s^{-1}$ ) | $k_{a2}$ ( $s^{-1}$ ) | $k_{d2}$ ( $s^{-1}$ )             | $K_D$ (nmol/L)        |                   |
|----------------------|-----------------------------------|-----------------------|-----------------------|-----------------------------------|-----------------------|-------------------|
| One-to-one two-state | $2.05 \times 10^4$                | $4.68 \times 10^{-4}$ | $9.01 \times 10^{-5}$ | $2.06 \times 10^{-5}$             | 5.24                  |                   |
| Fitting model        | $k_{a1}$ ( $M^{-1}\cdot s^{-1}$ ) | $k_{d1}$ ( $s^{-1}$ ) | $K_{D1}$ (nmol/L)     | $k_{a2}$ ( $M^{-1}\cdot s^{-1}$ ) | $k_{d2}$ ( $s^{-1}$ ) | $K_{D2}$ (nmol/L) |
| One-to-two           | $4.62 \times 10^4$                | $5.07 \times 10^{-4}$ | 11                    | $2.03 \times 10^4$                | $1.18 \times 10^{-5}$ | 0.578             |
